# Supplementary material
Source: PubMed Central journal article supplement (PMC9294578)
Supplement: sj-pdf-1-dst-10.1177_1932296821992373.pdf [file sj-pdf-1-dst-10.1177_1932296821992373.pdf]

## Supplemental data

Supplemental figure SF1: Box-whisker plots for blood glucose (BG) and continuous glucose monitoring rates of change over hour of the day, limited to induced glucose excursions between 08:00 and 13:00 on days 2 and 7 of the study. Whiskers indicate 5<sup>th</sup> and 95<sup>th</sup> percentiles (covering the 90% of values) and boxes indicate 25<sup>th</sup> and 75<sup>th</sup> percentiles (1<sup>st</sup> and 3<sup>rd</sup> quartiles, covering 50% of values). G5: Dexcom G5, FL: FreeStyle Libre.

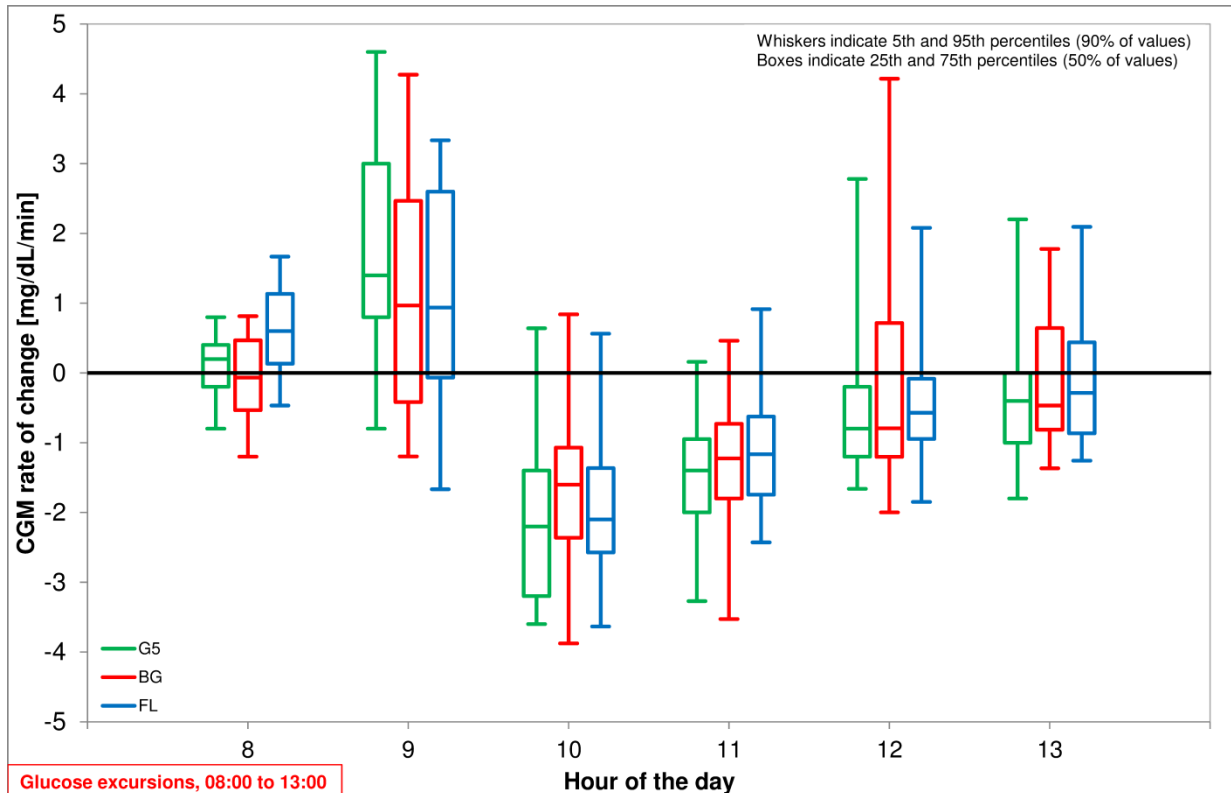

Supplemental Table ST1: Concurrence matrix of glucose rates of change for Dexcom G5 (G5) and blood glucose (BG) values, limited to induced glucose excursions between 08:00 and 13:00 on days 2 and 7 of the study (n=279).

|                               |                     | BG rate of change [mg/dL/min] |                     |                     |                  |                     |                     |           |
|-------------------------------|---------------------|-------------------------------|---------------------|---------------------|------------------|---------------------|---------------------|-----------|
|                               |                     | $\leq -3$                     | $> -3$ to $\leq -2$ | $> -2$ to $\leq -1$ | $> -1$ to $< +1$ | $\geq +1$ to $< +2$ | $\geq +2$ to $< +3$ | $\geq +3$ |
| G5 rate of change [mg/dL/min] | $\leq -3$           | 2.5%                          | 2.5%                | 1.4%                | -                | -                   | -                   | -         |
|                               | $> -3$ to $\leq -2$ | 1.1%                          | 2.9%                | 3.2%                | 0.7%             | -                   | -                   | -         |
|                               | $> -2$ to $\leq -1$ | -                             | 1.1%                | 17.2%               | 8.6%             | -                   | -                   | -         |
|                               | $> -1$ to $< +1$    | -                             | 0.4%                | 5.7%                | 33.0%            | 1.1%                | 0.4%                | 1.1%      |
|                               | $\geq +1$ to $< +2$ | -                             | -                   | 0.4%                | 2.9%             | 1.8%                | 0.7%                | 0.7%      |
|                               | $\geq +2$ to $< +3$ | -                             | -                   | -                   | -                | 2.5%                | 1.4%                | 0.4%      |
|                               | $\geq +3$           | -                             | -                   | -                   | -                | 0.7%                | 2.5%                | 3.2%      |

Supplemental Table ST2: Concurrence matrix of glucose rates of change for FreeStyle Libre (FL) and blood glucose (BG) values, limited to induced glucose excursions between 08:00 and 13:00 on days 2 and 7 of the study (n=283).

|                               |            | BG rate of change [mg/dL/min] |            |            |            |            |            |      |
|-------------------------------|------------|-------------------------------|------------|------------|------------|------------|------------|------|
|                               |            | ≤-3                           | >-3 to ≤-2 | >-2 to ≤-1 | >-1 to <+1 | ≥+1 to <+2 | ≥+2 to <+3 | ≥+3  |
| FL rate of change [mg/dL/min] | ≤-3        | 1.4%                          | 1.4%       | -          | 0.4%       | -          | -          | -    |
|                               | >-2 to ≤-1 | 1.8%                          | 3.2%       | 3.9%       | 1.1%       | -          | -          | -    |
|                               | >-3 to ≤-2 | 0.4%                          | 2.1%       | 13.8%      | 6.0%       | -          | 0.4%       | -    |
|                               | >-1 to <+1 | 0.7%                          | 0.4%       | 10.2%      | 30.0%      | 2.1%       | 1.8%       | 0.4% |
|                               | ≥+1 to <+2 | -                             | -          | -          | 6.0%       | 2.1%       | 0.7%       | 1.1% |
|                               | ≥+2 to <+3 | -                             | -          | -          | 0.4%       | 1.4%       | 1.4%       | 1.1% |
|                               | ≥+3        | -                             | -          | -          | 0.4%       | 0.4%       | 1.1%       | 2.8% |

Supplemental Table ST3: Concurrence matrix of glucose rates of change for Dexcom G5 (G5) and FreeStyle Libre (FL) values, limited to induced glucose excursions between 08:00 and 13:00 on days 2 and 7 of the study (n=278).

|                               |                     | FL rate of change [mg/dL/min] |                     |                     |                  |                     |                     |           |
|-------------------------------|---------------------|-------------------------------|---------------------|---------------------|------------------|---------------------|---------------------|-----------|
|                               |                     | $\leq -3$                     | $> -3$ to $\leq -2$ | $> -2$ to $\leq -1$ | $> -1$ to $< +1$ | $\geq +1$ to $< +2$ | $\geq +2$ to $< +3$ | $\geq +3$ |
| G5 rate of change [mg/dL/min] | $\leq -3$           | 2.2%                          | 3.2%                | 0.4%                | 0.7%             | -                   | -                   | -         |
|                               | $> -3$ to $\leq -2$ | 0.4%                          | 4.3%                | 2.9%                | 0.4%             | -                   | -                   | -         |
|                               | $> -2$ to $\leq -1$ | -                             | 1.8%                | 13.3%               | 11.5%            | 0.4%                | -                   | -         |
|                               | $> -1$ to $< +1$    | -                             | 0.4%                | 5.4%                | 28.4%            | 5.8%                | 0.7%                | 0.7%      |
|                               | $\geq +1$ to $< +2$ | 0.4%                          | 0.4%                | 0.4%                | 2.2%             | 1.8%                | 1.1%                | 0.4%      |
|                               | $\geq +2$ to $< +3$ | -                             | -                   | -                   | 1.4%             | 1.8%                | 1.1%                | -         |
|                               | $\geq +3$           | -                             | -                   | -                   | 1.1%             | 0.4%                | 1.4%                | 3.6%      |
